# Supplementary material
Source: HighWire-hosted journal article supplement (https://cmaj.ca/highwire/filestream/59596/field_highwire_adjunct_files/4/150771-res-Appendix_3.pdf)
Supplement: 150771-res-Appendix_3.pdf [file 150771-res-Appendix_3.pdf]

**Appendix 3 (as supplied by the authors): Baseline Characteristics of Matched and Unmatched Subjects in ACEI and ARB Cohorts.**

| Characteristics                                                        | ARB cohort   |              | ACEI cohort  |              |
|------------------------------------------------------------------------|--------------|--------------|--------------|--------------|
|                                                                        | Matched      | Unmatched    | Matched      | Unmatched    |
| <b>Patient (no.)</b>                                                   | 9,769        | 5,404        | 9,769        | 1,477        |
| <b>Mean age (SD), year</b>                                             | 58.9 (11.1)  | 61.0 (11.0)  | 59.0 (11.2)  | 56.6 (11.0)  |
| <b>Male</b>                                                            | 5,112 (52.3) | 2,164 (40.0) | 5,075 (52.0) | 969 (65.6)   |
| <b>Monthly income, NT dollars</b>                                      |              |              |              |              |
| <b>Dependent</b>                                                       | 2,965 (30.4) | 1,820 (33.7) | 2,980 (30.5) | 406 (27.5)   |
| <b>&lt;19,100</b>                                                      | 1,946 (19.9) | 951 (17.6)   | 1,916 (19.6) | 339 (23.0)   |
| <b>19,100–41,999</b>                                                   | 4,173 (42.7) | 2,187 (40.5) | 4,201 (43.0) | 654 (44.3)   |
| <b>≥42,000</b>                                                         | 685 (7.0)    | 446 (8.3)    | 672 (6.9)    | 78 (5.3)     |
| <b>Urbanization<sup>a</sup></b>                                        |              |              |              |              |
| <b>Level 1</b>                                                         | 3,909 (40.0) | 1,924 (35.6) | 3,906 (40.0) | 641 (43.4)   |
| <b>Level 2</b>                                                         | 5,367 (54.9) | 3,163 (58.5) | 5,379 (55.1) | 777 (52.6)   |
| <b>Level 3</b>                                                         | 419 (4.3)    | 280 (5.2)    | 408 (4.2)    | 50 (3.4)     |
| <b>Level 4 (rural area)</b>                                            | 74 (0.8)     | 37 (0.7)     | 76 (0.8)     | 9 (0.6)      |
| <b>Outpatient Visits, in the past one year</b>                         |              |              |              |              |
| <b>0–5 visits</b>                                                      | 53 (0.5)     | 29 (0.5)     | 52 (0.5)     | 11 (0.7)     |
| <b>6–10 visits</b>                                                     | 544 (5.6)    | 275 (5.1)    | 569 (5.8)    | 73 (4.9)     |
| <b>11–15 visits</b>                                                    | 1,262 (12.9) | 682 (12.6)   | 1,259 (12.9) | 145 (9.8)    |
| <b>&gt;15 visits</b>                                                   | 7,910 (81.0) | 4,418 (81.8) | 7,889 (80.8) | 1,248 (84.5) |
| <b>Charlson Comorbidity Index Score<sup>b</sup></b>                    |              |              |              |              |
| <b>2</b>                                                               | 2,999 (30.7) | 1,106 (20.5) | 3,030 (31.0) | 636 (43.1)   |
| <b>3</b>                                                               | 2,066 (21.1) | 911 (16.9)   | 2,049 (21.0) | 396 (26.8)   |
| <b>4</b>                                                               | 1,711 (17.5) | 952 (17.6)   | 1,714 (17.5) | 206 (13.9)   |
| <b>≥ 5</b>                                                             | 2,993 (30.6) | 2,435 (45.1) | 2,976 (30.5) | 239 (16.2)   |
| <b>Adapted Diabetes Complications Severity Index score<sup>c</sup></b> | 2.8 (1.8)    | 3.4 (2.0)    | 2.8 (1.8)    | 2.47 (1.68)  |
| <b>Anti-diabetic drugs</b>                                             |              |              |              |              |
| <b>Acarbose inhibits enzymes</b>                                       | 855 (8.8)    | 721 (13.3)   | 821 (8.4)    | 34 (2.3)     |
| <b>Sulfonylurea</b>                                                    | 4,993 (51.1) | 2,743 (50.8) | 5,058 (51.8) | 761 (51.5)   |
| <b>Insulin</b>                                                         | 528 (5.4)    | 379 (7.0)    | 527 (5.4)    | 68 (4.6)     |
| <b>Metformin</b>                                                       | 6,072 (62.2) | 3,323 (61.5) | 6,071 (62.1) | 887 (60.1)   |

|                                             |              |              |              |              |
|---------------------------------------------|--------------|--------------|--------------|--------------|
| <b>Thiazolidinediones</b>                   | 999 (10.2)   | 1,305 (24.1) | 1,022 (10.5) | 16 (1.1)     |
| <b>Glinide</b>                              | 575 (5.9)    | 517 (9.6)    | 547 (5.6)    | 20 (1.4)     |
| <b>Dipeptidyl peptidase-4 inhibitor</b>     | 127 (1.3)    | 402 (7.4)    | 103 (1.1)    | 0 (0)        |
| <b>Anti-hypertensive drug</b>               |              |              |              |              |
| <b>Alpha-blocker</b>                        | 335 (3.4)    | 230 (4.3)    | 326 (3.3)    | 46 (3.1)     |
| <b>Beta-blocker</b>                         | 1,683 (17.2) | 1,010 (18.7) | 1,625 (16.6) | 249 (16.9)   |
| <b>Calcium channel blocker</b>              | 3,576 (36.6) | 2,745 (50.8) | 3,488 (35.7) | 345 (23.4)   |
| <b>Diuretics</b>                            | 1,762 (18.0) | 953 (17.6)   | 1,761 (18.0) | 271 (18.3)   |
| <b>Other anti-hypertensive drug</b>         | 140 (1.4)    | 38 (0.7)     | 150 (1.5)    | 63 (4.3)     |
| <b>Other concomitant medications</b>        |              |              |              |              |
| <b>Aspirin</b>                              | 1,850 (18.9) | 1,251 (23.1) | 1,814 (18.6) | 217 (14.7)   |
| <b>Clopidogrel</b>                          | 51 (0.5)     | 113 (2.1)    | 52 (0.5)     | 0 (0)        |
| <b>Ticlopidine</b>                          | 30 (0.3)     | 41 (0.8)     | 29 (0.3)     | 1 (0.1)      |
| <b>Warfarin</b>                             | 38 (0.4)     | 40 (0.7)     | 37 (0.4)     | 3 (0.2)      |
| <b>Dipyridamole</b>                         | 477 (4.9)    | 283 (5.2)    | 488 (5.0)    | 110 (7.4)    |
| <b>Nitrate</b>                              | 423 (4.3)    | 316 (5.8)    | 408 (4.2)    | 71 (4.8)     |
| <b>Statin</b>                               | 2,226 (22.8) | 1,935 (35.8) | 2,217 (22.7) | 132 (8.9)    |
| <b>Proton pump inhibitor</b>                | 158 (1.6)    | 157 (2.9)    | 159 (1.6)    | 14 (0.9)     |
| <b>Non-steroidal anti-inflammatory drug</b> | 1,580 (16.2) | 671 (12.4)   | 1,581 (16.2) | 347 (23.5)   |
| <b>Comorbidities</b>                        |              |              |              |              |
| <b>Hypertension</b>                         | 9,037 (92.5) | 5,262 (97.4) | 9,030 (92.4) | 1,241 (84.0) |
| <b>Coronary artery disease</b>              | 3,223 (33.0) | 2,336 (43.2) | 3,204 (32.8) | 328 (22.2)   |
| <b>Heart failure</b>                        | 904 (9.3)    | 822 (15.2)   | 903 (9.2)    | 88 (6.0)     |
| <b>Peripheral vascular disease</b>          | 520 (5.3)    | 289 (5.3)    | 512 (5.2)    | 75 (5.1)     |
| <b>Peptic ulcer disease</b>                 | 3,709 (38.0) | 2,502 (46.3) | 3,717 (38.0) | 354 (24.0)   |
| <b>Liver disease</b>                        | 3,275 (33.5) | 1,991 (36.8) | 3,262 (33.4) | 363 (24.6)   |
| <b>Chronic kidney disease</b>               | 1,589 (16.3) | 1,368 (25.3) | 1,600 (16.4) | 156 (10.6)   |
| <b>Atrial fibrillation</b>                  | 176 (1.8)    | 178 (3.3)    | 170 (1.7)    | 6 (0.4)      |
| <b>Dyslipidemia</b>                         | 6,343 (64.9) | 4,089 (75.7) | 6,388 (65.4) | 685 (46.4)   |
| <b>Valvular heart disease</b>               | 601 (6.2)    | 554 (10.3)   | 598 (6.1)    | 37 (2.5)     |
| <b>Cancer</b>                               | 788 (8.1)    | 612 (11.3)   | 773 (7.9)    | 59 (4.0)     |
| <b>Autoimmune disease</b>                   | 306 (3.1)    | 287 (5.3)    | 328 (3.4)    | 18 (1.2)     |
| <b>Physical limitation</b>                  | 443 (4.5)    | 284 (5.3)    | 451 (4.6)    | 45 (3.0)     |
| <b>Propensity score (SD)</b>                | 0.56 (0.12)  | 0.70 (0.08)  | 0.56 (0.12)  | 0.34 (0.08)  |

---

\* All data were described as number (%), except mean age and propensity score.

<sup>a</sup>Urbanization levels in Taiwan are divided into four strata according to the Taiwan National Health Research Institute publications. Level 1 designates the most urbanized areas, and level 4 designates the least urbanized areas.

<sup>b</sup>Charlson Comorbidity Index score is used to determine overall systemic health. With each increased level of the score, there are stepwise increases in the cumulative mortality.

<sup>c</sup>Adapted Diabetes Complications Severity Index is a 13-point scale from 7 complication categories: retinopathy, nephropathy, neuropathy, cerebrovascular, cardiovascular, peripheral vascular disease, and metabolic, ranging from each complication. Each complication produced a numeric score ranging from 0 to 2 (0 = no abnormality, 1 = some abnormality, 2 = severe abnormality).

*Abbreviations:* SD, standard deviation; StD, Standardized difference; NT\$, new Taiwan dollars; ACEI, angiotensin-converting-enzyme inhibitors; ARB, Angiotensin II receptor blockers.
